# Supplementary material
Source: Springer Nature journal article supplement (https://www.springermedizin.de/resource/supplementary/12943_2009_567_MOESM6_ESM.pdf/9554988)

**A.**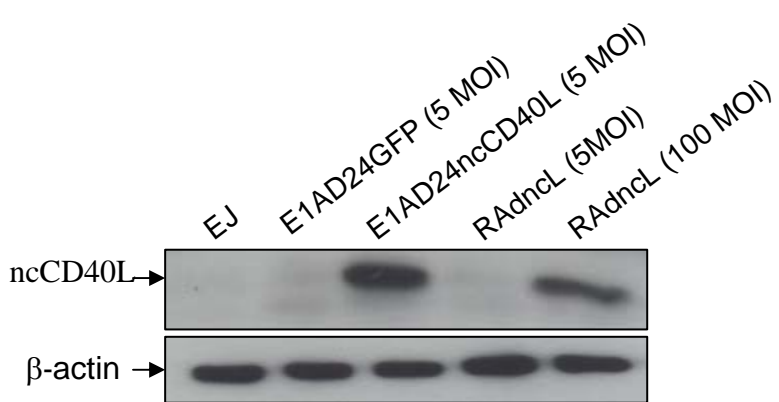**B.**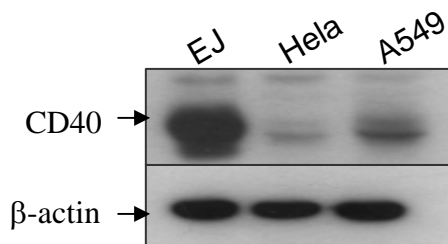**C.**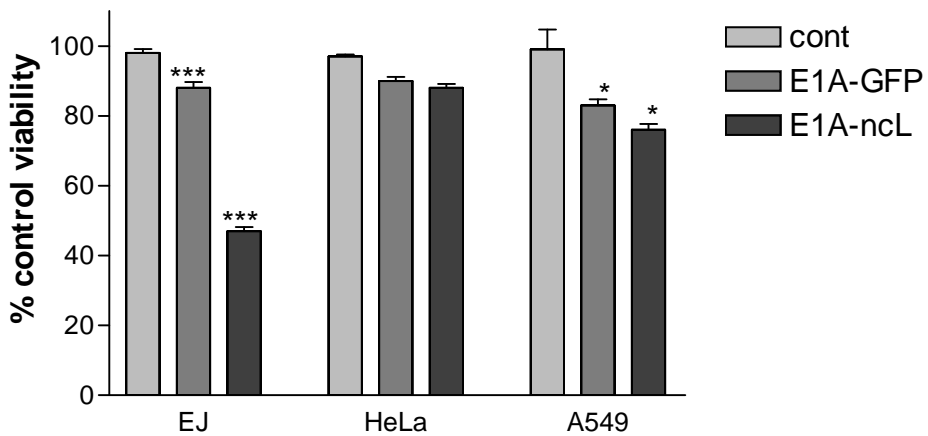

Supplement: MOESM6 [file 9554988]
